# Supplementary material for: A thin, deformable, high-performance supercapacitor implant that can be biodegraded and bioabsorbed within an animal body
Source: PubMed Central journal article supplement — Sci Adv. 2021 Jan 8;7(2):eabe3097. doi: 10.1126/sciadv.abe3097 (PMC7793580; doi:10.1126/sciadv.abe3097), 2021-01-08
Supplement: abe3097_SM.pdf [file abe3097_SM.pdf]

## Supplementary Materials for

### **A thin, deformable, high-performance supercapacitor implant that can be biodegraded and bioabsorbed within an animal body**

Hongwei Sheng, Jingjing Zhou, Bo Li, Yuhang He, Xuetao Zhang, Jie Liang, Jinyuan Zhou, Qing Su, Erqing Xie, Wei Lan\*, Kairong Wang\*, Cunjiang Yu\*

\*Corresponding author. Email: [lanw@lzu.edu.cn](mailto:lanw@lzu.edu.cn) (W.L.); [wangkr@lzu.edu.cn](mailto:wangkr@lzu.edu.cn) (K.W.); [cyu15@uh.edu](mailto:cyu15@uh.edu) (C.Y.)

Published 8 January 2021, *Sci. Adv.* **7**, eabe3097 (2021)  
DOI: 10.1126/sciadv.abe3097

#### **This PDF file includes:**

Calculations  
Figs. S1 to S19  
Tables S1 and S2

## Calculations

The areal capacitance for the MoO<sub>x</sub> electrodes and the as-fabricated supercapacitor implants was calculated from cyclic voltammetry (CV) and galvanostatic charge-discharge (GCD) profiles based on the following equations, respectively:

$$C_{area} = \frac{1}{2\nu A \Delta V} \oint I(V) dV \quad (1)$$

$$C_{area} = \frac{\int_{t_0}^t i dt}{\Delta V A} \quad (2)$$

where  $C_{area}$  is the areal capacitance in F cm<sup>-2</sup>,  $\nu$  is the scan rate in V s<sup>-1</sup>;  $\Delta V$  is a potential range in V,  $I(V)$  is the instantaneous current in CV curves and  $V$  is applied voltage in V.  $i$  refers to the discharge current;  $t_0$  and  $t$  are the starting time and end time for discharge process, respectively. And  $A$  corresponds to the effective area of the active material layer (MoO<sub>x</sub> flakes).

The energy density and power density of the supercapacitor implants were calculated using the following equations:

$$E = \frac{1}{2} \times C_{area} \times \frac{(\Delta V)^2}{3600} \quad (3)$$

$$P = \frac{E}{\Delta t} \times 3600 \quad (4)$$

Where  $E$  and  $P$  correspond to the areal energy density and power density, respectively.  $\Delta t$  is discharge time.

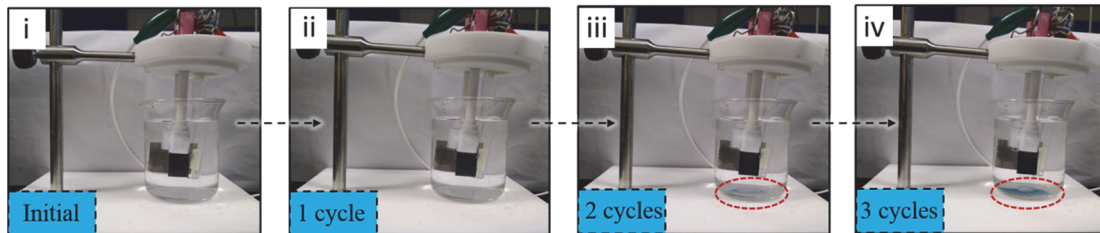

**Fig. S1. Optical images of the Mo foil at initial oxidation stage.** This process (i-iv) is followed by the continuous corrosion and electro-polishing of Mo foil. Photo credit: Hongwei Sheng, Lanzhou University.

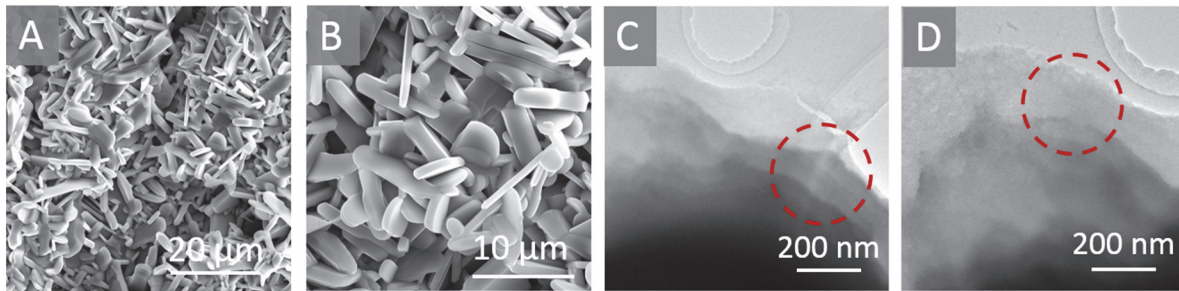

**Fig. S2. Morphology of MoO<sub>x</sub> electrode and the delaminated MoO<sub>x</sub> flakes. (A-B)** SEM images of MoO<sub>x</sub> electrode at different magnifications. **(C-D)** TEM images of the delaminated MoO<sub>x</sub> flakes, indicating an apparent layered structure.

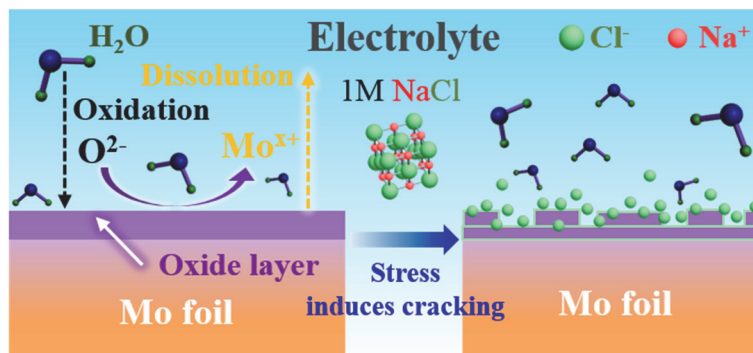

**Fig. S3.** Schematic illustrating the mechanism of  $\text{MoO}_x$  micro-blocks formed on Mo foil surface.

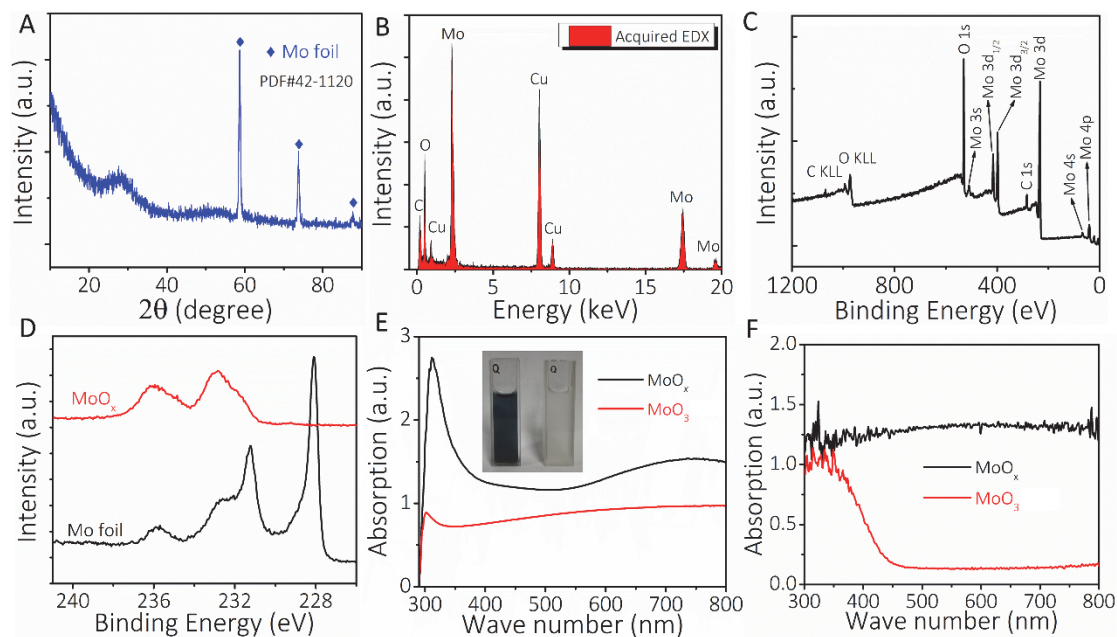

**Fig. S4. Spectrum analysis of MoO<sub>x</sub> electrode and MoO<sub>x</sub> flakes.** (A) XRD pattern of the as-synthesized MoO<sub>x</sub> electrode. Three intense peaks centered at 40.5, 58.6, and 73.7 ° can be indexed to the (110), (200), and (211) crystal planes of metallic Mo (PDF#42-1120), respectively. (B) The acquired EDX spectrum of the delaminated MoO<sub>x</sub> flakes. (C) XPS survey spectrum of MoO<sub>x</sub> electrode. (D) Comparison of Mo 3d XPS spectra with MoO<sub>x</sub> electrode and pure Mo foil. The corresponding ultraviolet-visible (UV-Vis) absorption spectra of the MoO<sub>x</sub> flakes and MoO<sub>3</sub> at (E) aqueous solutions and (F) powers states. Inset: a digital photograph of MoO<sub>x</sub> (left) and MoO<sub>3</sub> (right) aqueous solutions. Photo credit: Hongwei Sheng, Lanzhou University.

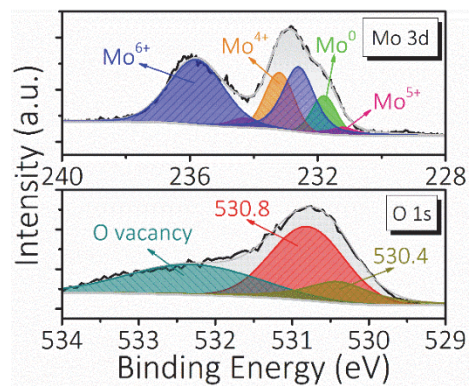

**Fig. S5. The core-level XPS spectra of Mo 3d and O 1s of MoO<sub>x</sub> flakes.**

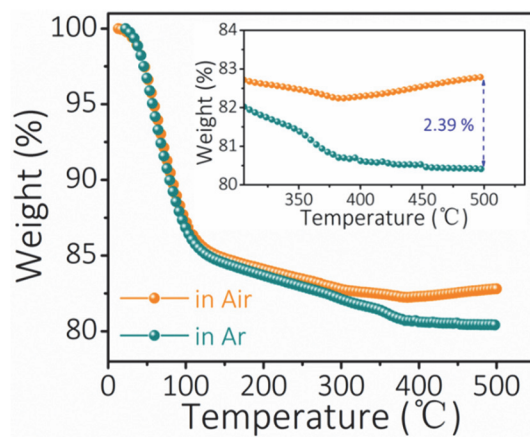

**Fig. S6. Thermal gravimetric analysis (TGA) curves for MoO<sub>x</sub> (in Air, and Ar).** The concentration of oxygen vacancies was calculated from the difference in weight decrease between the two TGA traces.



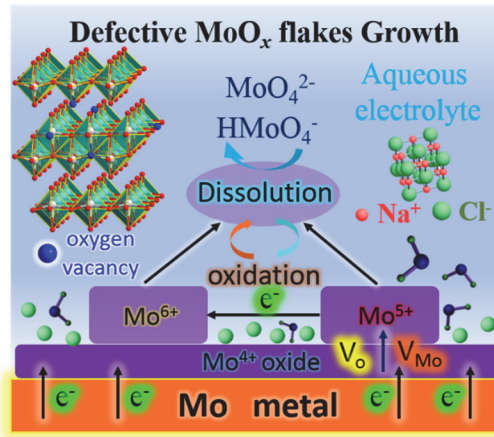

**Fig. S7. Schematic of a proposed model for the Mo/oxide film interface during the anodization.**

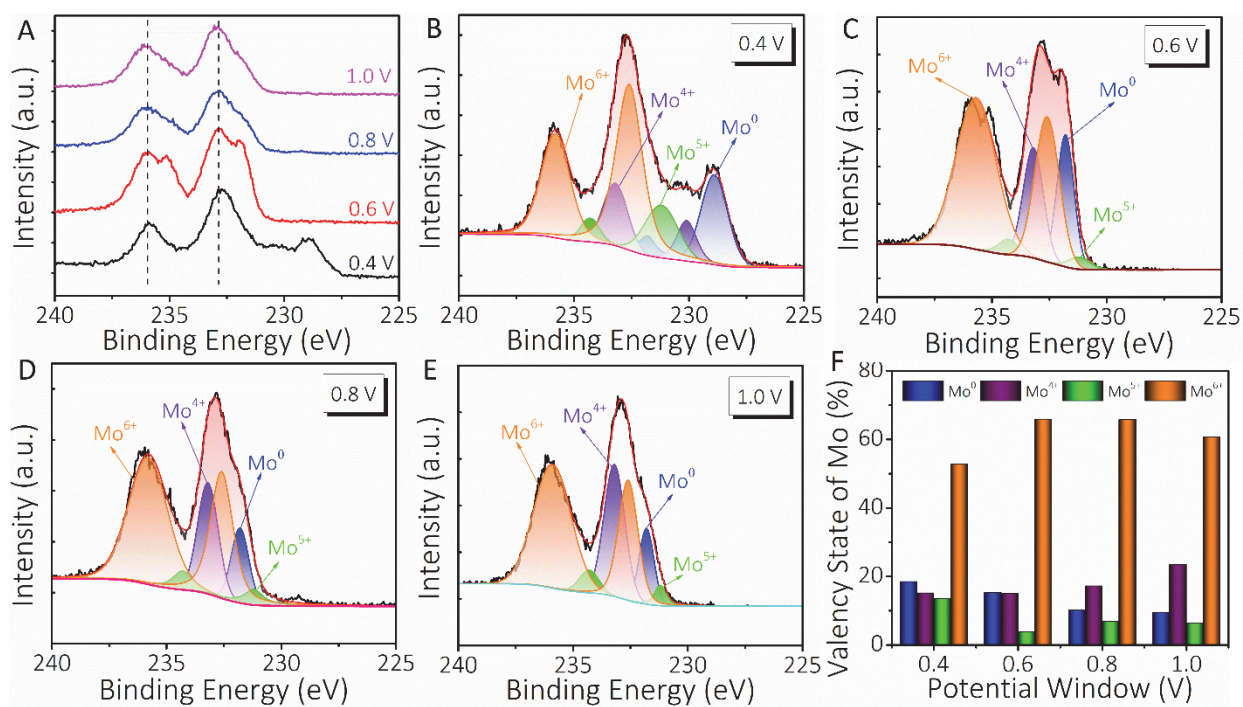

**Fig. S8. XPS spectra of Mo 3d for MoO<sub>x</sub> flakes anodized at different potential windows. (A)** The integrated and **(B-E)** the individual core-level XPS spectra of Mo 3d, and **(F)** the distribution percent of Mo valence states.

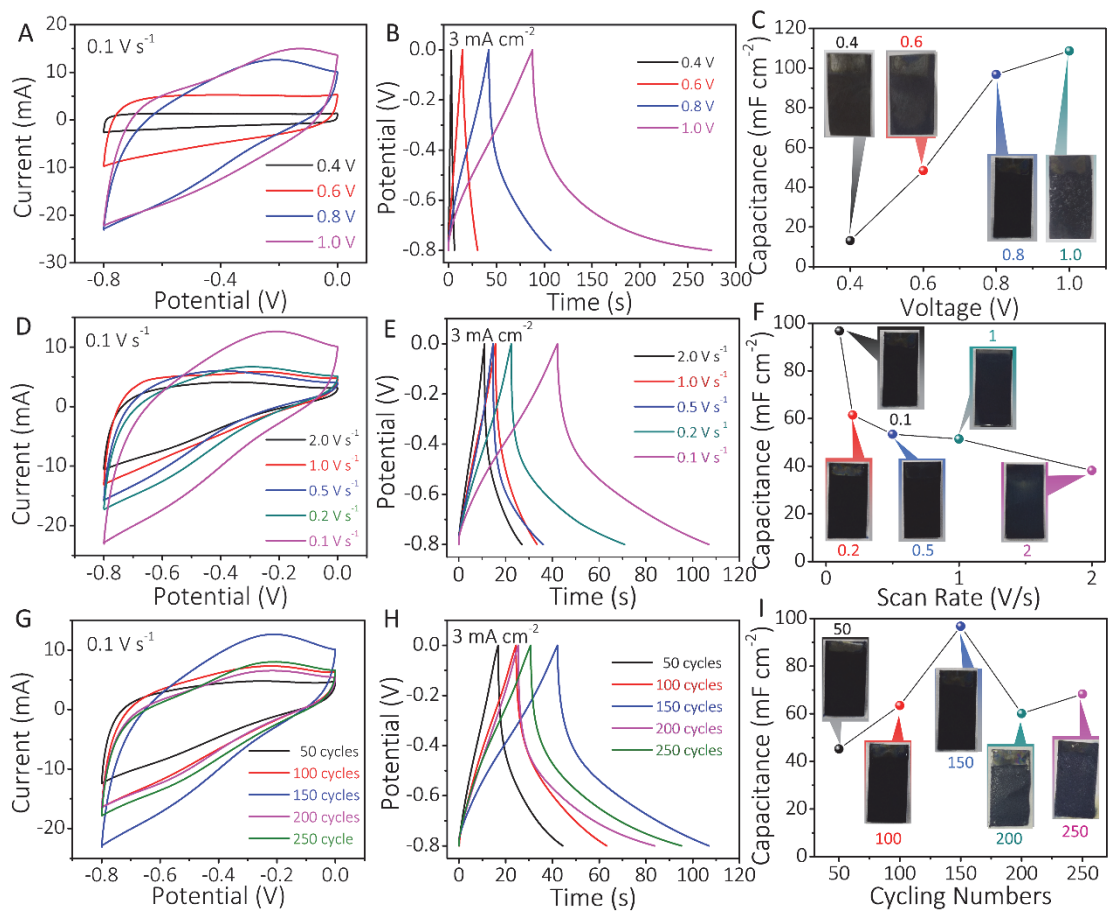

**Fig. S9. Electrochemical characterizations of  $\text{MoO}_x$  electrodes under different oxidation conditions.** CV curves (at  $0.1 \text{ V s}^{-1}$ ), GCD curves, and the calculated areal capacitance of  $\text{MoO}_x$  electrode at (A-C) different potential windows, (D-F) different scan rates, and (G-I) different cycling numbers. The overvoltage anodization made contact between  $\text{MoO}_x$  flakes and Mo foil weak, resulting in reduced utilization of active materials. Photo credit: Hongwei Sheng, Lanzhou University.

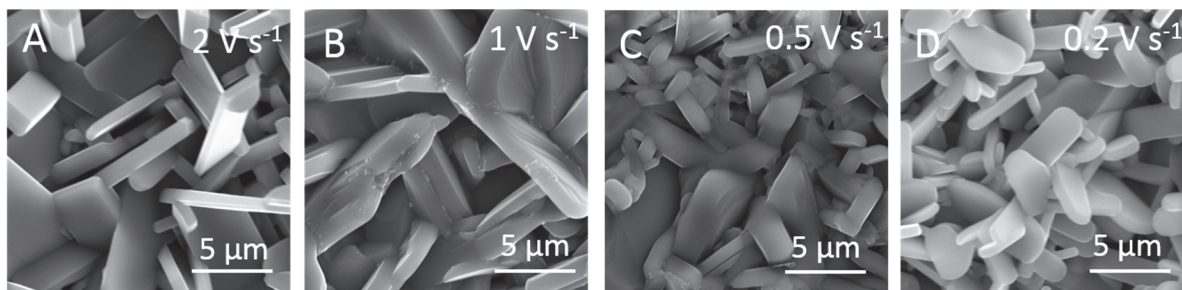

**Fig. S10. SEM images of MoO<sub>x</sub> electrode (at 0.8 V, 150 cycles) anodized at different scan rates. (A-D) 2, 1, 0.5 and 0.2 V s<sup>-1</sup>, respectively.**

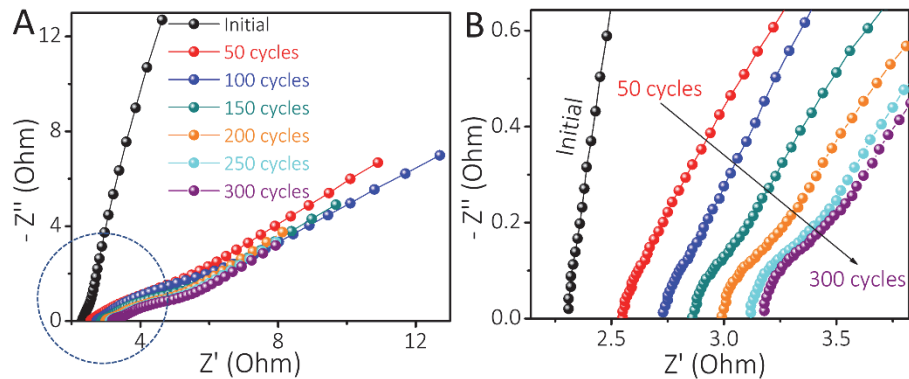

**Fig. S11. EIS curves and partial enlargement of  $\text{MoO}_x$  electrodes (anodized at 0.8 V,  $0.1 \text{ Vs}^{-1}$ ) after different cycling numbers. (A-B) With increasing cycle numbers, the stress induces the partial oxide to fall off from the surface, and the equivalent series resistance ( $R_s$ ) of  $\text{MoO}_x$  electrodes also increases.**

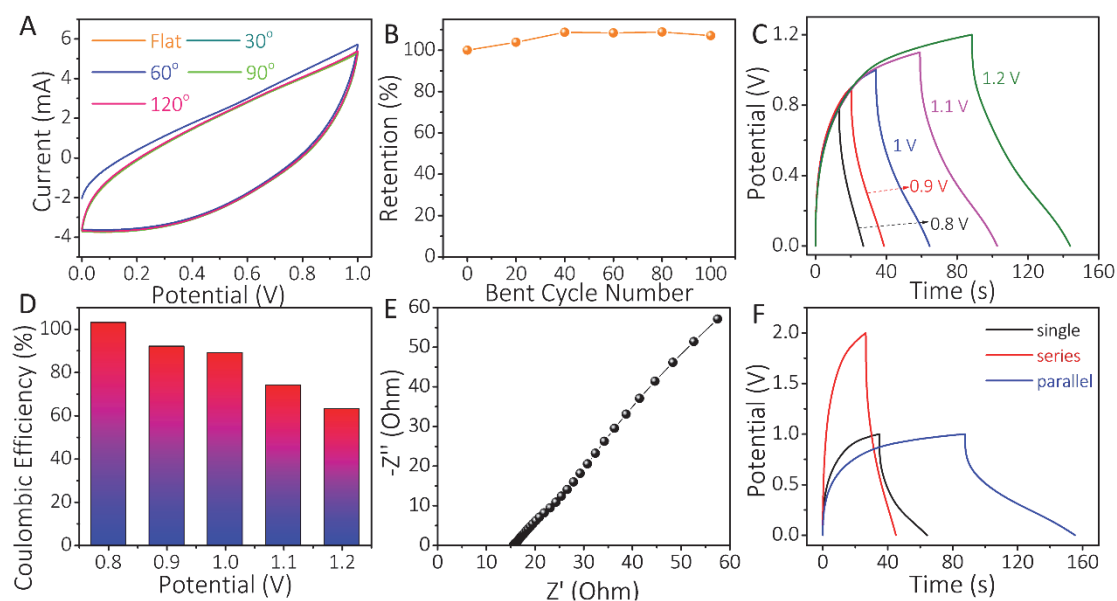

**Fig. S12. Electrochemical performances of the supercapacitor impalnt.** (A) CV curves (at 0.1 V s<sup>-1</sup>) of MoO<sub>x</sub>-based supercapacitors under various bending angles. (B) Capacitance retention after bending 100 times. (C) GCD curves at 2 mA cm<sup>-2</sup>, and (D) Coulombic efficiency of MoO<sub>x</sub>-based supercapacitors under different voltage windows. (E) Nyquist plot of MoO<sub>x</sub>-based supercapacitor. (F) GCD curves (at 2 mA cm<sup>-2</sup>) of two supercapacitor devices connected in series or parallel.

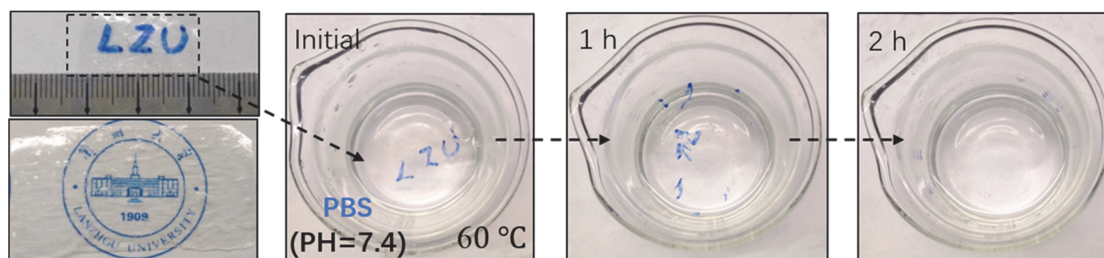

**Fig. S13. Time sequential photographs of the Alg-Na gel electrolyte film degrade in PBS at 60 °C.** Photo credit: Hongwei Sheng, Lanzhou University.

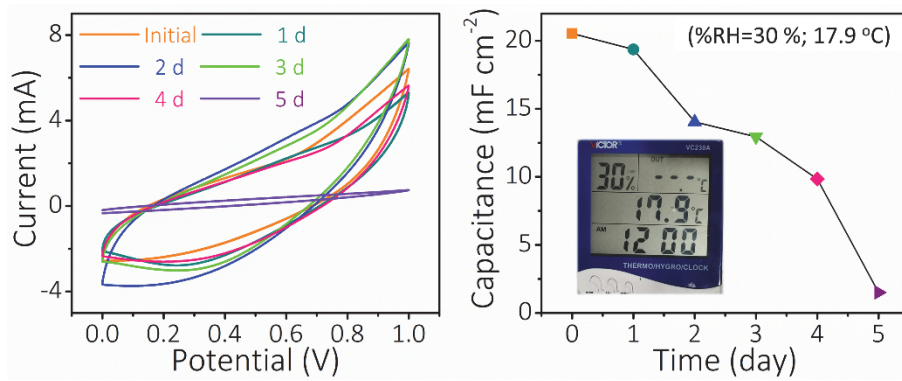

**Fig. S14. Electrochemical stability of the encapsulated supercapacitors in open ambient environment (%RH=30 %; 17.9 °C).** Photo credit: Hongwei Sheng, Lanzhou University.



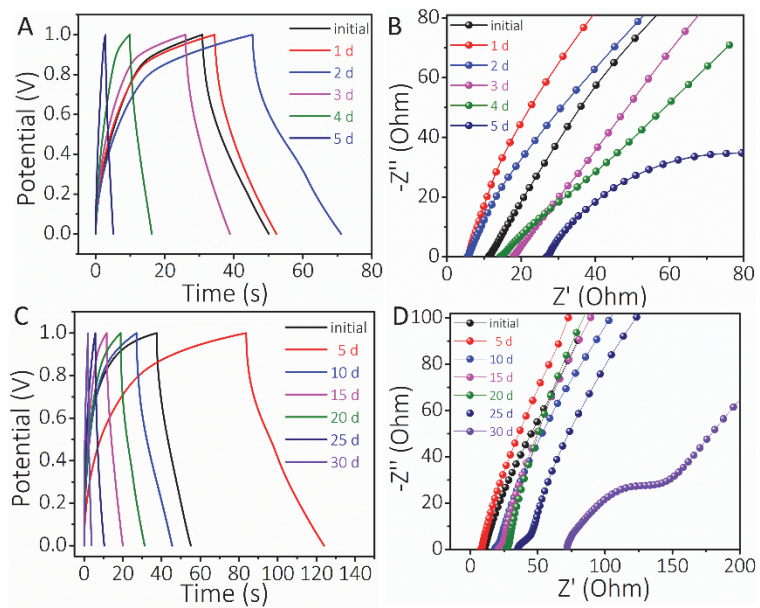

**Fig. S15. GCD curves and EIS plots of the encapsulated supercapacitors in PBS. For (A–B) a short period of time and (C–D) a long period of time in PBS solution at 37 °C, respectively.**

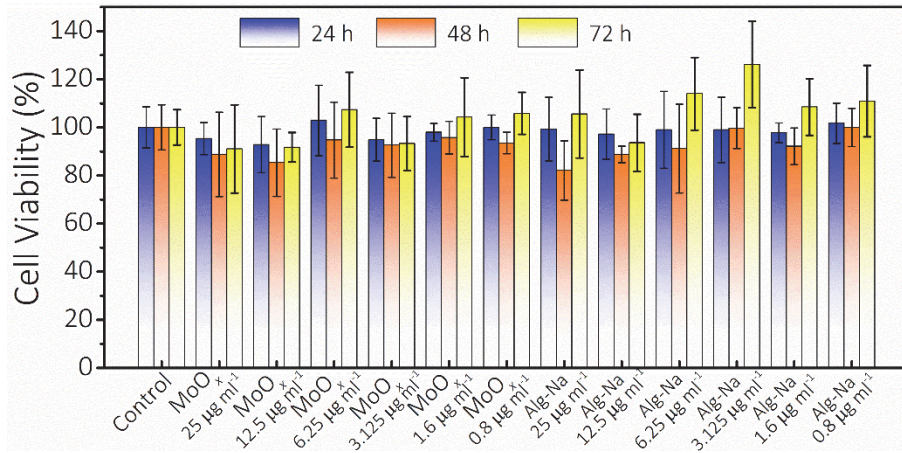

**Fig. S16. MTT analysis of the cultured HEC-1-A cells.** The error bar represents a standard deviation.

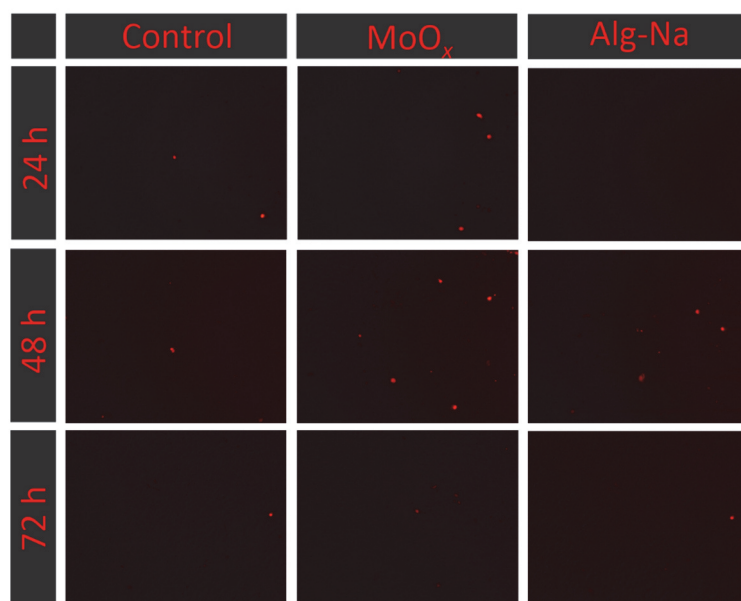

**Fig. S17. Fluorescent images of the cell viability.** The red dots (PI) represent dead HEC-1-A cells.

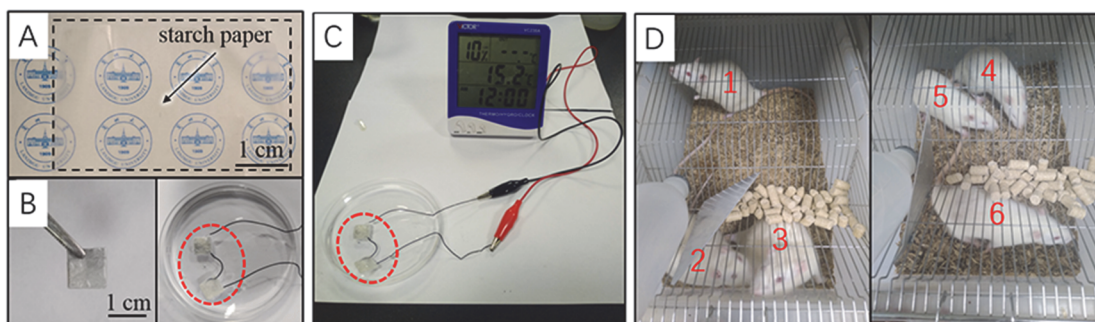

**Fig. S18. Digital photographs of the encapsulated supercapacitors and *in vivo* implantation experiments.** (A) The transparent starch paper, and (B) the encapsulated supercapacitors. (C) Demonstration of driving an electronic thermometer using the encapsulated supercapacitors in series in PBS solution. (D) *In vivo* implantation experiments were performed in the dorsal subcutaneous region of SD rats (six parallel experiments). Photo credit: Hongwei Sheng, Lanzhou University.

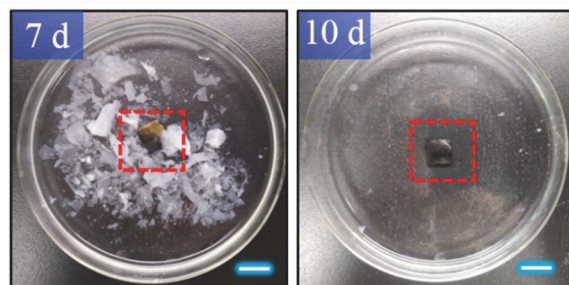

**Fig. S19. Digital photographs of the encapsulated supercapacitor in PBS solution at 85 °C. (A) After 7 days. (B) After 10 days. Scale bar: 1 cm. Photo credit: Hongwei Sheng, Lanzhou University.**

|       | Mo 3d <sub>3/2</sub>       |                             |                             |                             | Mo 3d <sub>5/2</sub>       |                             |                             |                             |
|-------|----------------------------|-----------------------------|-----------------------------|-----------------------------|----------------------------|-----------------------------|-----------------------------|-----------------------------|
|       | Mo <sup>0</sup><br>(231.8) | Mo <sup>4+</sup><br>(233.2) | Mo <sup>5+</sup><br>(234.3) | Mo <sup>6+</sup><br>(235.7) | Mo <sup>0</sup><br>(228.7) | Mo <sup>4+</sup><br>(230.1) | Mo <sup>5+</sup><br>(231.2) | Mo <sup>6+</sup><br>(232.6) |
| 0.4 V | 3.05%                      | 9.55%                       | 2.76%                       | 20.8%                       | 15.40%                     | 5.62%                       | 10.81%                      | 32.01%                      |
| 0.6 V | 15.27%                     | 15.04%                      | 2.12%                       | 41.95%                      | —                          | —                           | 1.68%                       | 23.94%                      |
| 0.8 V | 10.14%                     | 17.19%                      | 3.6%                        | 40.14%                      | —                          | —                           | 3.3%                        | 25.63%                      |
| 1.0 V | 9.5%                       | 23.51%                      | 3.7%                        | 39.54%                      | —                          | —                           | 2.6%                        | 21.05%                      |

**Table S1. The specific percentages of Mo valence states for MoO<sub>x</sub> electrodes anodized at different potential windows.**

| Electrode Materials            | Electrolyte               | Thickness                  | Operation Voltage | Workable Time In Water | Degradable | Capacitance (mF cm <sup>-2</sup> ) | Energy Density (μWh cm <sup>-2</sup> ) | Power Density (mW cm <sup>-2</sup> ) | Ref.      |
|--------------------------------|---------------------------|----------------------------|-------------------|------------------------|------------|------------------------------------|----------------------------------------|--------------------------------------|-----------|
| MnO <sub>2</sub> @Si nanowires | Li-ion doped ionic liquid | —                          | 2.2 V             | —                      | —          | 13                                 | 9.1                                    | 0.388                                | [37]      |
| Au-MnO <sub>2</sub> -Au        | PVA/LiClO <sub>4</sub>    | ~ 1.6 μm (electrode)       | 0.8 V             | —                      | —          | 11.9                               | 1.1                                    | 0.1                                  | [36]      |
| Metallic Mo                    | NaCl@Agarose              | ~ 160 μm                   | 0.8 V             | 12 h                   | Yes        | 1.6                                | 0.14                                   | 1                                    | [14]      |
| Oxidized Mo wire               | PVA/PBS                   | —                          | 0.8 V             | —                      | Yes        | 4.15                               | 0.37                                   | 0.8                                  | [35]      |
| Fe/ZnO                         | PVA/PBS                   | ~ 50 μm (except substrate) | 1.0 V             | 30 days                | Yes        | 1.1                                | 0.153                                  | 0.526                                | [34]      |
| MoO <sub>3</sub> flakes        | Sodium alginate           | 30 μm                      | 1.0 V             | 30 days                | Yes        | 112.5                              | 15.64                                  | 2.53                                 | This work |

**Table S2. Comparison of the overall performance of supercapacitors with other reported biodegradable supercapacitors.**
